# Supplementary material
Source: publisher figshare collection journal article supplement (https://frontiersin.figshare.com/ndownloader/files/23856491)
Supplement: Supplementary file [file 23856491]

## Supplementary Material

### 1. SUPPLEMENTARY FIGURES

A)

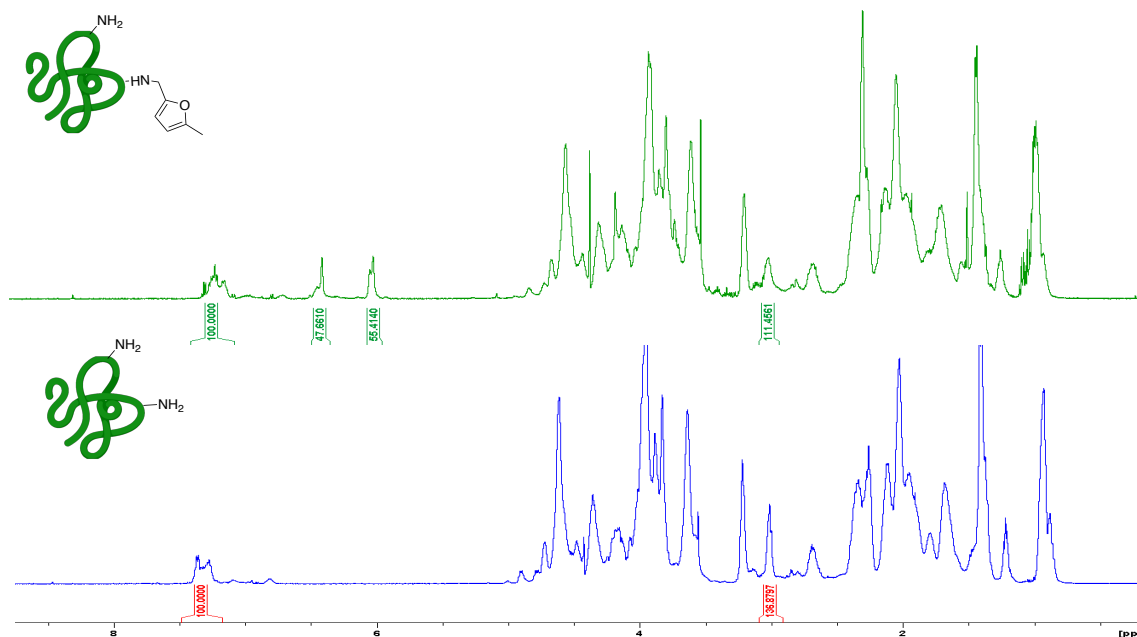

B)

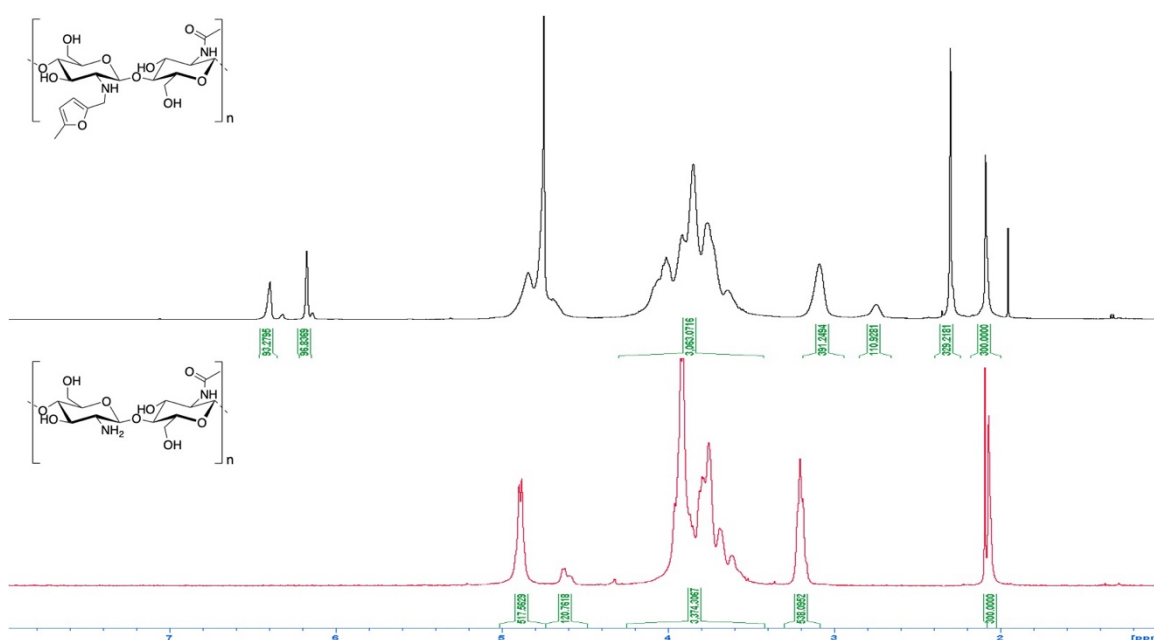

**Figure S1:** Integrated spectra of gelatin (A) and chitosan (B) unfunctionalized and functionalized with 5-methylfurfural.

**A)**

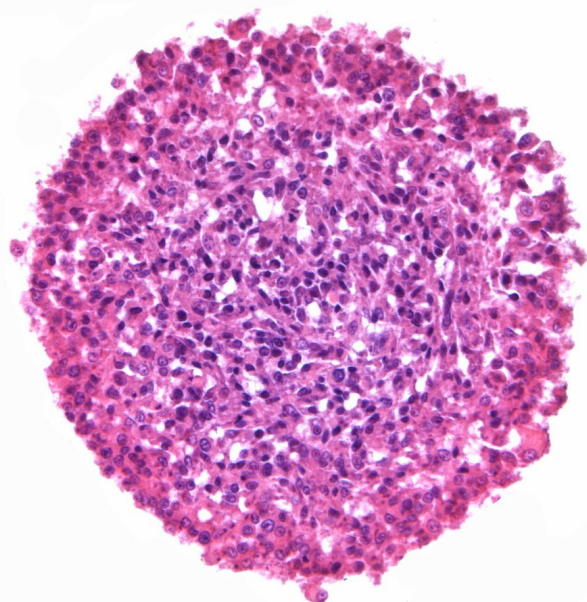

100  $\mu$ m

**B)**

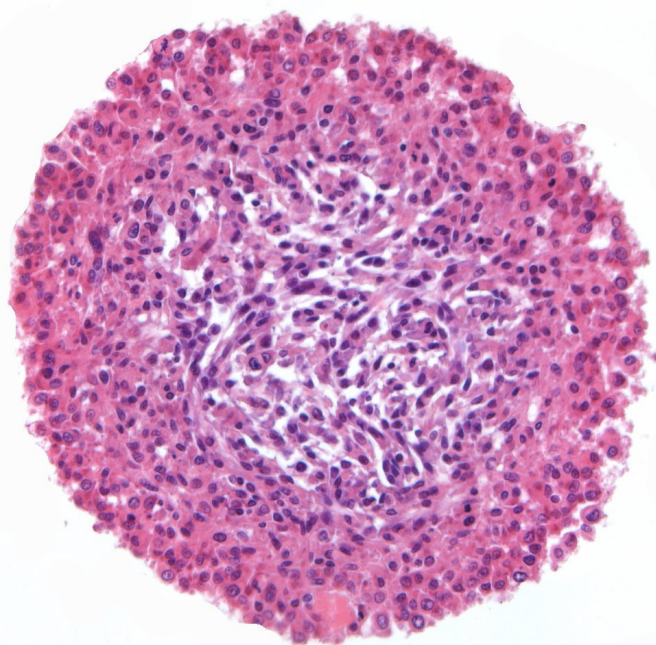

100  $\mu$ m

**C)**

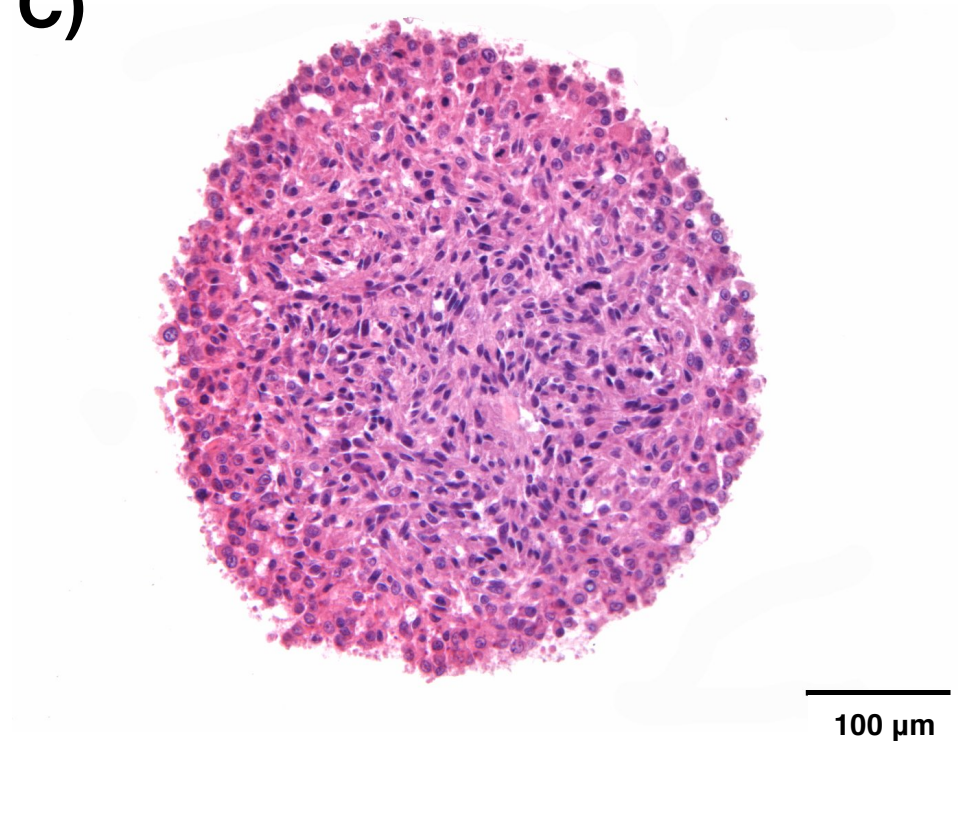

**Figure S2.** Histological images of spheroids embedded in GE-CH hydrogel at day 1 (A), 3 (B) and 6 (C).
